# Supplementary material for: Facile syntheses of pure uranium halides: UCl4, UBr4and UI4
Source: Royal Society of Chemistry journal article supplement (doi:10.1039/c7dt00726d), 2017-01-01
Supplement: c7dt00726d1.pdf [file c7dt00726d1.pdf]

Supporting information:

IR spectra:

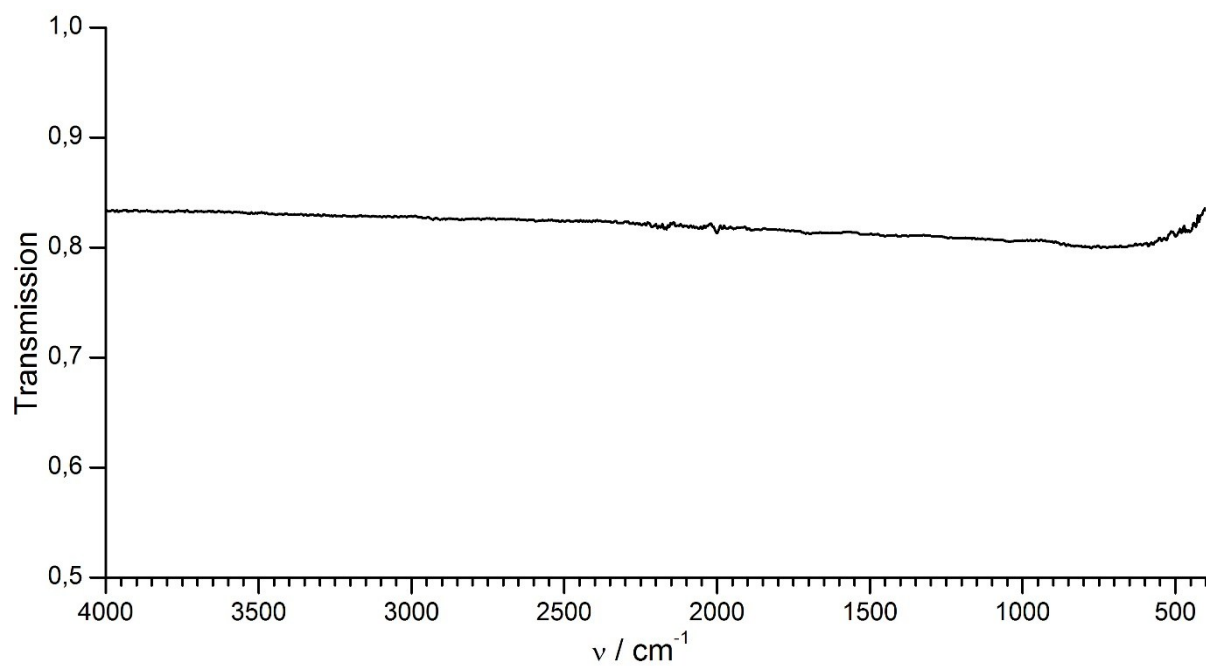

Figure S1. Diamond ATR-FTIR spectrum of  $\text{UCl}_4$ .

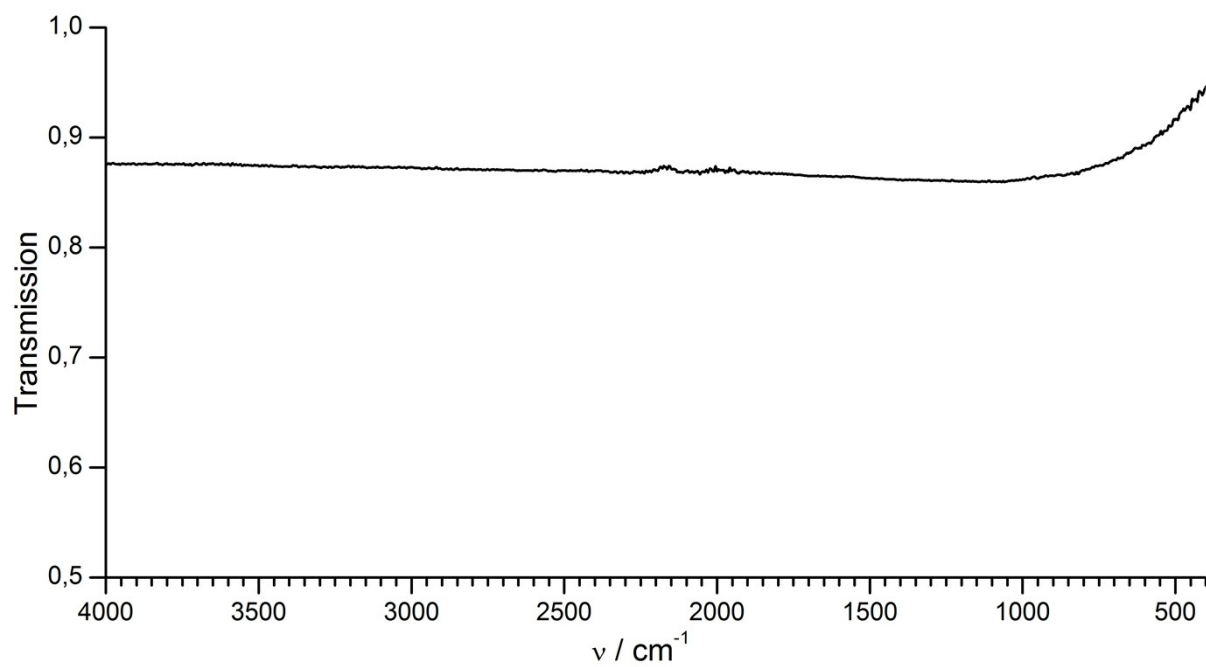

Figure S2. Diamond ATR-FTIR spectrum of  $\text{UBr}_4$ .

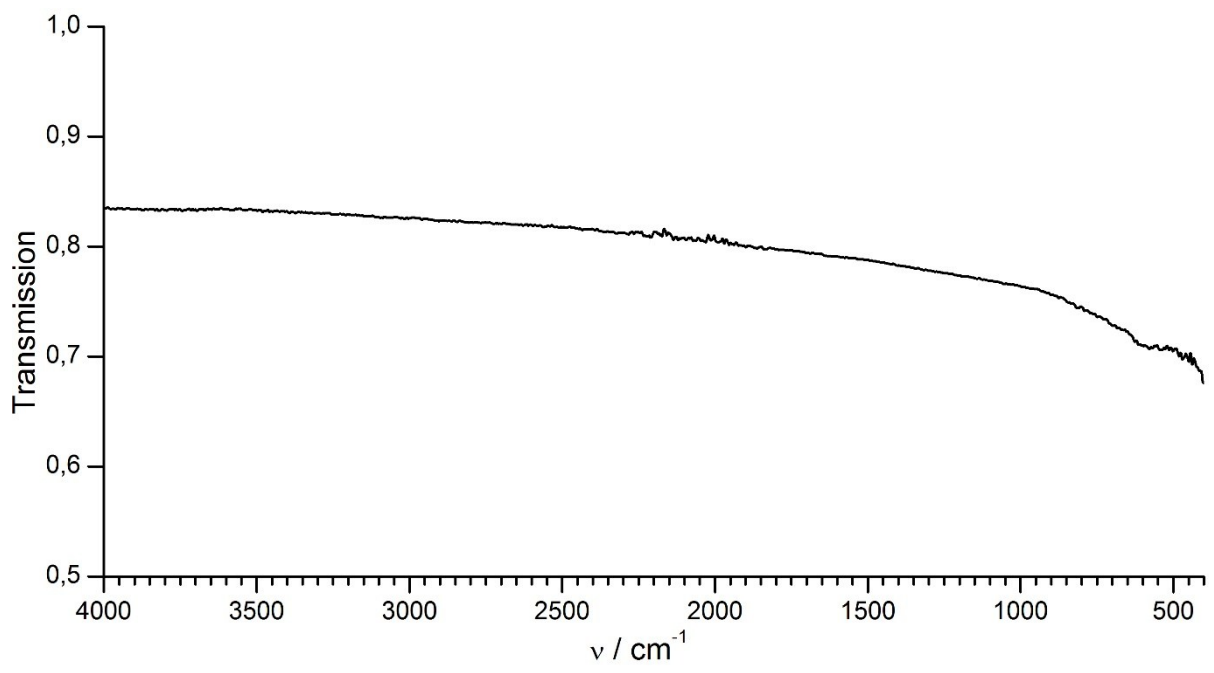

Figure S3. Diamond ATR-FTIR spectrum of UI<sub>4</sub>.
